# Supplementary material for: Intake of Fat-Soluble Vitamins in the Belgian Population: Adequacy and Contribution of Foods, Fortified Foods and Supplements
Source: PubMed Central journal article supplement (PMC5579653; doi:10.3390/nu9080860), 2017-08-11
Supplement: nutrients-09-00860-s001.pdf [file nutrients-09-00860-s001.pdf]

Table S1. Contribution of food groups to total intake of vitamin A, D, E and K, Belgian population, Belgian food consumption survey 2014

| FOOD GROUPS                          | Mean contribution to total vitamin A intake in 2014 (%) | Mean contribution to total vitamin D intake in 2014 (%) | Mean contribution to total vitamin E intake in 2014 (%) | Mean contribution to total vitamin K intake in 2014 (%) |
|--------------------------------------|---------------------------------------------------------|---------------------------------------------------------|---------------------------------------------------------|---------------------------------------------------------|
| Potatoes and other tubers            | 0.2 (0.2-0.3)                                           | 0.0 (0.0-0.0)                                           | 2.5 (2.2-2.8)                                           | 0.3 (0.0-0.7)                                           |
| Vegetables                           | 31.4 (29.9-33.0)                                        | 0.0 (0.0-0.0)                                           | 13.1 (12.2-13.9)                                        | 53.7 (51.8-55.7)                                        |
| Legumes                              | 0.0 (0.0-0.0)                                           | 0.0 (0.0-0.0)                                           | 0.1 (0.1-0.2)                                           | 0.7 (0.4-1.0)                                           |
| Fruits, nuts and seeds               | 2.6 (2.3-2.9)                                           | 0.0 (0.0-0.0)                                           | 7.1 (6.4-7.7)                                           | 10.8 (9.7-11.9)                                         |
| Dairy products                       | 22.0 (20.9-23.2)                                        | 20.4 (19.1-21.8)                                        | 5.7 (5.2-6.1)                                           | 16.2 (14.8-17.6)                                        |
| Cereals and cereal products          | 0.4 (0.3-0.4)                                           | 2.6 (2.1-3.1)                                           | 5.7 (5.2-6.1)                                           | 1.3 (1.0-1.6)                                           |
| Meat and meat products               | 8.0 (7.0-9.1)                                           | 27.3 (24.9-29.8)                                        | 9.1 (8.3-9.8)                                           | 0.1 (0.0-0.2)                                           |
| Fish and shellfish                   | 0.8 (0.5-1.0)                                           | 8.5 (7.3-9.7)                                           | 3.6 (3.0-4.2)                                           | 0.0 (0.0-0.0)                                           |
| Eggs and egg products                | 2.8 (2.4-3.2)                                           | 5.0 (4.3-5.8)                                           | 3.4 (2.9-3.9)                                           | 0.0 (0.0-0.1)                                           |
| Fat                                  | 13.4 (12.5-14.2)                                        | 18.5 (17.1-19.8)                                        | 13.1 (12.2-14.1)                                        | 9.1 (7.9-10.2)                                          |
| Sugar and confectionery              | 1.7 (1.4-2.0)                                           | 3.3 (2.5-4.0)                                           | 7.7 (6.8-8.5)                                           | 0.0 (0.0-0.0)                                           |
| Cakes and sweet biscuits             | 6.4 (5.7-7.1)                                           | 7.4 (6.6-8.2)                                           | 8.4 (7.7-9.2)                                           | 2.8 (2.1-3.4)                                           |
| Non-alcoholic beverages              | 2.6 (1.9-3.2)                                           | 0.1 (0.0-0.1)                                           | 3.1 (2.5-3.7)                                           | 0.0 (0.0-0.1)                                           |
| Alcoholic beverages                  | 0.0 (0.0-0.0)                                           | 0.0 (0.0-0.0)                                           | 0.0 (0.0-0.0)                                           | 0.0 (0.0-0.0)                                           |
| Sauces, spices, herbs and condiments | 4.5 (4.0-5.0)                                           | 2.5 (2.0-3.0)                                           | 11.4 (10.4-12.4)                                        | 3.8 (3.1-4.5)                                           |
| Soups, bouillon                      | 0.0 (0.0-0.0)                                           | 0.0 (0.0-0.0)                                           | 0.0 (0.0-0.0)                                           | 0.0 (0.0-0.0)                                           |
| Miscellaneous*                       | 0.4 (0.2-0.7)                                           | 0.4 (0.2-0.6)                                           | 0.3 (0.2-0.5)                                           | 0.0 (0.0-0.0)                                           |
| Savoury snacks**                     | 0.3 (0.2-0.5)                                           | 0.3 (0.2-0.5)                                           | 2.2 (1.9-2.6)                                           | 0.2 (0.0-0.4)                                           |
| Food supplements                     | 2.5 (1.8-3.1)                                           | 5.8 (4.7-6.9)                                           | 3.5 (2.8-4.3)                                           | 0.9 (0.6-1.2)                                           |

Table S2. Usual intake of retinol ( $\mu\text{g}/\text{day}$ ) from food, fortified food and supplements in Belgian men (3-64 years),  
Belgian study on the intake of vitamins A, D, E and K (VITADEK-study) 2015

| Gender/age   | Usual intake                 | Percentiles |     |     |      | UL   | %<br>> UL    |   |
|--------------|------------------------------|-------------|-----|-----|------|------|--------------|---|
|              |                              | 5           | 50  | 95  | 97.5 |      |              |   |
| <b>MEN</b>   |                              |             |     |     |      |      |              |   |
| <b>3-6</b>   | Food                         | 338         | 96  | 280 | 773  | 932  | 800-1100 (1) | 2 |
|              | + mandatorily fortified food | 378         | 125 | 324 | 811  | 979  | 800          | 3 |
|              | + voluntarily fortified food | 397         | 132 | 339 | 869  | 1024 | 800          | 3 |
|              | + supplements                | 410         | 135 | 350 | 886  | 1069 | 800          | 4 |
| <b>7-10</b>  | Food                         | 339         | 96  | 282 | 776  | 937  | 1500         | 0 |
|              | + mandatorily fortified food | 383         | 128 | 327 | 843  | 988  | 1500         | 0 |
|              | + voluntarily fortified food | 399         | 130 | 336 | 866  | 1036 | 1500         | 0 |
|              | + supplements                | 411         | 139 | 352 | 886  | 1047 | 1500         | 0 |
| <b>11-14</b> | Food                         | 342         | 97  | 284 | 782  | 944  | 2000         | 0 |
|              | + mandatorily fortified food | 385         | 132 | 329 | 838  | 975  | 2000         | 0 |
|              | + voluntarily fortified food | 396         | 136 | 337 | 854  | 1023 | 2000         | 0 |
|              | + supplements                | 414         | 134 | 351 | 914  | 1067 | 2000         | 0 |
| <b>15-17</b> | Food                         | 345         | 98  | 287 | 789  | 952  | 2600         | 0 |
|              | + mandatorily fortified food | 394         | 133 | 332 | 862  | 1026 | 2600         | 0 |
|              | + voluntarily fortified food | 401         | 134 | 338 | 873  | 1033 | 2600         | 0 |
|              | + supplements                | 421         | 141 | 355 | 927  | 1099 | 2600         | 0 |
| <b>18-39</b> | Food                         | 366         | 104 | 305 | 837  | 1009 | 3000         | 0 |
|              | + mandatorily fortified food | 421         | 143 | 361 | 902  | 1068 | 3000         | 0 |
|              | + voluntarily fortified food | 424         | 145 | 364 | 907  | 1070 | 3000         | 0 |
|              | + supplements                | 447         | 149 | 380 | 974  | 1161 | 3000         | 0 |
| <b>40-64</b> | Food                         | 432         | 124 | 359 | 983  | 1184 | 3000         | 0 |
|              | + mandatorily fortified food | 537         | 195 | 468 | 1112 | 1322 | 3000         | 0 |
|              | + voluntarily fortified food | 537         | 194 | 468 | 1112 | 1315 | 3000         | 0 |
|              | + supplements                | 553         | 198 | 481 | 1155 | 1353 | 3000         | 0 |

(1)The UL for retinol is 800  $\mu\text{g}/\text{day}$  in children aged 1-3 years and 1100  $\mu\text{g}/\text{day}$  in children aged 4-6 years old. UL: upper intake level

Table S3. Usual intake of retinol ( $\mu\text{g}/\text{day}$ ) from food, fortified food and supplements in Belgian women (3-64 years),  
Belgian study on the intake of vitamins A, D, E and K (VITADEK-study) 2015

| Gender/age   | Usual intake                 | Percentiles |     |     |      | UL   | % >UL                   |   |
|--------------|------------------------------|-------------|-----|-----|------|------|-------------------------|---|
|              |                              | 5           | 50  | 95  | 97.5 |      |                         |   |
| <b>WOMEN</b> |                              |             |     |     |      |      |                         |   |
| <b>3-6</b>   | Food                         | 262         | 89  | 231 | 539  | 628  | 800-1100 <sup>(1)</sup> | 0 |
|              | + mandatorily fortified food | 304         | 120 | 272 | 598  | 686  | 800                     | 0 |
|              | + voluntarily fortified food | 310         | 123 | 279 | 600  | 692  | 800                     | 0 |
|              | + supplements                | 343         | 127 | 301 | 713  | 844  | 800                     | 1 |
| <b>7-10</b>  | Food                         | 266         | 91  | 235 | 546  | 635  | 1500                    | 0 |
|              | + mandatorily fortified food | 304         | 119 | 274 | 590  | 687  | 1500                    | 0 |
|              | + voluntarily fortified food | 315         | 123 | 282 | 615  | 724  | 1500                    | 0 |
|              | + supplements                | 331         | 125 | 292 | 669  | 794  | 1500                    | 0 |
| <b>11-14</b> | Food                         | 269         | 92  | 238 | 553  | 643  | 2000                    | 0 |
|              | + mandatorily fortified food | 308         | 120 | 278 | 599  | 700  | 2000                    | 0 |
|              | + voluntarily fortified food | 312         | 124 | 280 | 612  | 696  | 2000                    | 0 |
|              | + supplements                | 332         | 127 | 295 | 672  | 793  | 2000                    | 0 |
| <b>15-17</b> | Food                         | 272         | 94  | 241 | 559  | 650  | 2600                    | 0 |
|              | + mandatorily fortified food | 310         | 121 | 280 | 591  | 678  | 2600                    | 0 |
|              | + voluntarily fortified food | 316         | 124 | 284 | 616  | 708  | 2600                    | 0 |
|              | + supplements                | 339         | 128 | 297 | 695  | 829  | 2600                    | 0 |
| <b>18-39</b> | Food                         | 284         | 98  | 252 | 582  | 676  | 3000                    | 0 |
|              | + mandatorily fortified food | 330         | 131 | 298 | 635  | 728  | 3000                    | 0 |
|              | + voluntarily fortified food | 341         | 133 | 305 | 664  | 770  | 3000                    | 0 |
|              | + supplements                | 407         | 141 | 333 | 932  | 1190 | 3000                    | 0 |
| <b>40-64</b> | Food                         | 306         | 107 | 271 | 622  | 722  | 3000                    | 0 |
|              | + mandatorily fortified food | 372         | 151 | 338 | 707  | 807  | 3000                    | 0 |
|              | + voluntarily fortified food | 380         | 154 | 343 | 722  | 838  | 3000                    | 0 |
|              | + supplements                | 430         | 164 | 374 | 905  | 1063 | 3000                    | 0 |

(1) The UL retinol for is 800  $\mu\text{g}/\text{day}$  in children aged 1-3 years and 1100  $\mu\text{g}/\text{day}$  in children aged 4-6 years old. UL: upper intake level

Table S4. Usual intake of vitamin A ( $\mu\text{g}/\text{day}$ ) from food, fortified food and supplements in Belgian men (3-64 years), excluding miss-reporters, Belgian study on the intake of vitamins A, D, E and K (VITADEK-study) 2015

| Gender/age | Usual intake (CI)            | Percentiles |     |      |      | EAR  | % < EAR                | UL | % > UL                  |   |
|------------|------------------------------|-------------|-----|------|------|------|------------------------|----|-------------------------|---|
|            |                              | 5           | 50  | 95   | 97,5 |      |                        |    |                         |   |
| 3-6        | Food                         | 653         | 257 | 578  | 1299 | 1517 | 205-245 <sup>(1)</sup> | 3  | 800-1100 <sup>(1)</sup> | 1 |
|            | + mandatorily fortified food | 691         | 289 | 618  | 1344 | 1552 |                        | 2  |                         | 3 |
|            | + voluntarily fortified food | 721         | 311 | 649  | 1371 | 1605 |                        | 1  |                         | 3 |
|            | + supplements                | 736         | 313 | 662  | 1399 | 1618 |                        | 1  |                         | 4 |
| 7-10       | Food                         | 678         | 267 | 601  | 1351 | 1577 | 320                    | 10 | 1500                    | 0 |
|            | + mandatorily fortified food | 721         | 304 | 648  | 1378 | 1614 |                        | 6  |                         | 0 |
|            | + voluntarily fortified food | 749         | 318 | 676  | 1431 | 1642 |                        | 5  |                         | 0 |
|            | + supplements                | 754         | 321 | 683  | 1429 | 1643 |                        | 5  |                         | 1 |
| 11-14      | Food                         | 705         | 278 | 625  | 1404 | 1639 | 580                    | 44 | 2000                    | 0 |
|            | + mandatorily fortified food | 753         | 320 | 675  | 1448 | 1711 |                        | 37 |                         | 0 |
|            | + voluntarily fortified food | 770         | 334 | 698  | 1472 | 1696 |                        | 35 |                         | 0 |
|            | + supplements                | 797         | 337 | 717  | 1530 | 1785 |                        | 32 |                         | 0 |
| 15-17      | Food                         | 729         | 288 | 646  | 1452 | 1696 | 570                    | 40 | 2600                    | 0 |
|            | + mandatorily fortified food | 786         | 337 | 701  | 1526 | 1753 |                        | 32 |                         | 0 |
|            | + voluntarily fortified food | 801         | 351 | 726  | 1516 | 1741 |                        | 30 |                         | 0 |
|            | + supplements                | 835         | 353 | 746  | 1628 | 1874 |                        | 28 |                         | 0 |
| 18-39      | Food                         | 829         | 324 | 733  | 1658 | 1939 | 570                    | 31 | 3000                    | 0 |
|            | + mandatorily fortified food | 881         | 369 | 787  | 1710 | 1983 |                        | 24 |                         | 0 |
|            | + voluntarily fortified food | 895         | 382 | 801  | 1729 | 2009 |                        | 23 |                         | 0 |
|            | + supplements                | 918         | 385 | 820  | 1791 | 2080 |                        | 22 |                         | 0 |
| 40-64      | Food                         | 1023        | 399 | 904  | 2048 | 2396 | 570                    | 18 | 3000                    | 0 |
|            | + mandatorily fortified food | 1164        | 503 | 1045 | 2225 | 2576 |                        | 9  |                         | 0 |
|            | + voluntarily fortified food | 1175        | 501 | 1053 | 2250 | 2609 |                        | 9  |                         | 0 |
|            | + supplements                | 1188        | 510 | 1073 | 2258 | 2610 |                        | 8  |                         | 0 |

<sup>(1)</sup>The EAR for vitamin A is 205  $\mu\text{g}/\text{day}$  in children aged 1-3 years and 245  $\mu\text{g}/\text{day}$  in children aged 4-6 years old. The UL for vitamin A (retinol) is 800  $\mu\text{g}/\text{day}$  in children aged 1-3 years and 1100  $\mu\text{g}/\text{day}$  in children aged 4-6 years old.

EAR: Estimated average requirement; UL: upper intake level

Table S5. Usual intake of vitamin A ( $\mu\text{g}/\text{dag}$ ) from food, fortified food and supplements in Belgian women (3-64 years), excluding miss-reporters, Belgian study on the intake of vitamins A, D, E and K (VITADEK-study) 2015

| Gender/age | Usual intake<br>(CI)         | Percentiles |     |     |      | EAR  | %<br><<br>EAR          | UL | % UL                    |   |
|------------|------------------------------|-------------|-----|-----|------|------|------------------------|----|-------------------------|---|
|            |                              | 5           | 50  | 95  | 97,5 |      |                        |    |                         |   |
| 3-6        | Food                         | 607         | 270 | 552 | 1129 | 1295 | 205-245 <sup>(1)</sup> | 3  | 800-1000 <sup>(1)</sup> | 0 |
|            | + mandatorily fortified food | 651         | 311 | 598 | 1181 | 1338 |                        | 1  |                         | 0 |
|            | + voluntarily fortified food | 674         | 322 | 620 | 1212 | 1383 |                        | 1  |                         | 0 |
|            | + supplements                | 710         | 327 | 651 | 1302 | 1473 |                        | 1  |                         | 1 |
| 7-10       | Food                         | 628         | 279 | 571 | 1167 | 1338 | 320                    | 9  | 1500                    | 0 |
|            | + mandatorily fortified food | 673         | 321 | 619 | 1219 | 1370 |                        | 5  |                         | 0 |
|            | + voluntarily fortified food | 693         | 326 | 635 | 1247 | 1415 |                        | 5  |                         | 0 |
|            | + supplements                | 718         | 334 | 659 | 1312 | 1469 |                        | 4  |                         | 0 |
| 11-14      | Food                         | 648         | 289 | 590 | 1206 | 1383 | 490                    | 33 | 2000                    | 0 |
|            | + mandatorily fortified food | 691         | 329 | 636 | 1252 | 1414 |                        | 26 |                         | 0 |
|            | + voluntarily fortified food | 705         | 331 | 651 | 1262 | 1434 |                        | 23 |                         | 0 |
|            | + supplements                | 729         | 342 | 671 | 1327 | 1543 |                        | 22 |                         | 0 |
| 15-17      | Food                         | 667         | 297 | 607 | 1241 | 1423 | 490                    | 31 | 2600                    | 0 |
|            | + mandatorily fortified food | 716         | 334 | 652 | 1311 | 1500 |                        | 24 |                         | 0 |
|            | + voluntarily fortified food | 721         | 341 | 668 | 1291 | 1445 |                        | 23 |                         | 0 |
|            | + supplements                | 741         | 343 | 676 | 1360 | 1559 |                        | 21 |                         | 0 |
| 18-39      | Food                         | 744         | 329 | 676 | 1389 | 1595 | 490                    | 23 | 3000                    | 0 |
|            | + mandatorily food           | 799         | 372 | 732 | 1450 | 1657 |                        | 16 |                         | 0 |
|            | + voluntarily fortified food | 812         | 380 | 743 | 1479 | 1682 |                        | 15 |                         | 0 |
|            | + supplements                | 869         | 390 | 782 | 1645 | 1914 |                        | 14 |                         | 0 |
| 40-64      | Food                         | 891         | 394 | 809 | 1664 | 1911 | 490                    | 13 | 3000                    | 0 |
|            | + mandatorily fortified food | 986         | 465 | 906 | 1786 | 2043 |                        | 6  |                         | 0 |
|            | + voluntarily fortified food | 995         | 467 | 912 | 1798 | 2061 |                        | 6  |                         | 0 |
|            | + supplements                | 1055        | 489 | 969 | 1910 | 2165 |                        | 5  |                         | 0 |

(1) The EAR for vitamin A is 205  $\mu\text{g}/\text{day}$  in children aged 1-3 years and 245  $\mu\text{g}/\text{day}$  in children aged 4-6 years old. The UL for vitamin A (retinol) is 800  $\mu\text{g}/\text{day}$  in children aged 1-3 years and 1100  $\mu\text{g}/\text{day}$  in children aged 4-6 years old.

EAR: Estimated average requirement; UL: upper intake level.

Table S6. Usual intake of vitamin D ( $\mu\text{g}/\text{day}$ ) from food, fortified food and supplements in Belgian men (3-64 years), excluding miss-reporters, Belgian study on the intake of vitamins A, D, E and K (VITADEK-study) 2015

| Gender/age | Usual intake                 | Percentiles |      |      |       | AI    | % Inadequate <sup>(1)</sup> | UL                | % > UL |      |
|------------|------------------------------|-------------|------|------|-------|-------|-----------------------------|-------------------|--------|------|
|            |                              | 5           | 50   | 95   | 97,5  |       |                             |                   |        |      |
| 3-6        | Food                         | 2.10        | 0.78 | 1.86 | 4.20  | 4.88  | 15                          | ns <sup>(2)</sup> | 25     | 0    |
|            | + mandatorily fortified food | 2.54        | 1.12 | 2.31 | 4.73  | 5.47  | 15                          | ns                | 25     | 0    |
|            | + voluntarily fortified food | 3.57        | 1.53 | 3.30 | 6.53  | 7.33  | 15                          | ns                | 25     | 0    |
|            | + supplements                | 11.36       | 1.68 | 3.83 | 14.25 | 72.07 | 15                          | ns                | 25     | 3.43 |
| 7-10       | Food                         | 2.88        | 1.18 | 2.60 | 5.53  | 6.36  | 15                          | ns                | 25     | 0    |
|            | + mandatorily fortified food | 3.28        | 1.49 | 3.01 | 5.90  | 6.81  | 15                          | ns                | 25     | 0    |
|            | + voluntarily fortified food | 4.06        | 1.82 | 3.76 | 7.30  | 8.27  | 15                          | ns                | 25     | 0    |
|            | + supplements                | 5.50        | 1.91 | 4.06 | 9.07  | 11.81 | 15                          | ns                | 25     | 0.48 |
| 11-14      | Food                         | 3.20        | 1.32 | 2.90 | 6.11  | 7.02  | 15                          | ns                | 50     | 0    |
|            | + mandatorily fortified food | 3.60        | 1.63 | 3.29 | 6.64  | 7.59  | 15                          | ns                | 50     | 0    |
|            | + voluntarily fortified food | 4.22        | 1.91 | 3.88 | 7.52  | 8.53  | 15                          | ns                | 50     | 0    |
|            | + supplements                | 5.37        | 2.00 | 4.11 | 8.68  | 10.73 | 15                          | ns                | 50     | 0.34 |
| 15-17      | Food                         | 3.37        | 1.40 | 3.05 | 6.41  | 7.36  | 15                          | ns                | 50     | 0    |
|            | + mandatorily fortified food | 3.78        | 1.72 | 3.49 | 6.73  | 7.80  | 15                          | ns                | 50     | 0    |
|            | + voluntarily fortified food | 4.21        | 1.93 | 3.91 | 7.56  | 8.58  | 15                          | ns                | 50     | 0    |
|            | + supplements                | 4.56        | 2.04 | 4.13 | 8.40  | 9.70  | 15                          | ns                | 50     | 0.00 |
| 18-39      | Food                         | 3.62        | 1.51 | 3.28 | 6.88  | 7.90  | 15                          | ns                | 50     | 0    |
|            | + mandatorily fortified food | 4.11        | 1.88 | 3.80 | 7.44  | 8.45  | 15                          | ns                | 50     | 0    |
|            | + voluntarily fortified food | 4.46        | 2.03 | 4.11 | 8.05  | 9.15  | 15                          | ns                | 50     | 0    |
|            | + supplements                | 8.93        | 2.10 | 4.36 | 10.35 | 19.01 | 15                          | ns                | 50     | 1.72 |

|       |                                 |      |      |      |      |       |    |    |    |      |
|-------|---------------------------------|------|------|------|------|-------|----|----|----|------|
| 40-64 | Food                            | 3.78 | 1.58 | 3.43 | 7.18 | 8.23  | 15 | ns | 50 | 0    |
|       | + mandatorily<br>fortified food | 4.93 | 2.33 | 4.56 | 8.81 | 9.94  | 15 | ns | 50 | 0    |
|       | + voluntarily<br>fortified food | 5.15 | 2.44 | 4.79 | 9.11 | 10.26 | 15 | ns | 50 | 0    |
|       | + supplements                   | 5.68 | 2.48 | 4.92 | 9.74 | 11.25 | 15 | ns | 50 | 0.25 |

<sup>(1)</sup>When not enough evidence is available to set an EAR, an AI is set. The AI is based on the average intake of an apparently healthy population.

<sup>(2)</sup> When the mean intake of the population > the AI, the risk for inadequate intake is low. No statement (ns) can be formulated on the adequacy of vitamin D when the mean intake < AI.

EAR: Estimated average requirement; UL: upper intake level; AI: adequate intake

Table S7. Usual intake of vitamin D ( $\mu\text{g}/\text{day}$ ) from food, fortified food and supplements in Belgian women (3-64 years), excluding miss-reporters, Belgian study on the intake of vitamins A, D, E and K (VITADEK-study) 2015

| Gender/age | Usual intake                 | Percentiles |      |      |      | AI   | % Inadequate <sup>(1)</sup> | UL                | % > UL |     |
|------------|------------------------------|-------------|------|------|------|------|-----------------------------|-------------------|--------|-----|
|            |                              | 5           | 50   | 95   | 97,5 |      |                             |                   |        |     |
| 3-6        | Food                         | 2.84        | 0.85 | 2.39 | 6.33 | 7.58 | 15                          | ns <sup>(2)</sup> | 15     | 0   |
|            | + mandatorily fortified food | 3.12        | 1.13 | 2.70 | 6.57 | 7.73 | 15                          | ns                | 25     | 0   |
|            | + voluntarily fortified food | 3.86        | 1.50 | 3.45 | 7.62 | 8.83 | 15                          | ns                | 25     | 0   |
|            | + supplements                | 12.1        | 1.7  | 4.0  | 14.3 | 44.7 | 15                          | ns                | 25     | 3.1 |
| 7-10       | Food                         | 2.86        | 0.86 | 2.41 | 6.37 | 7.64 |                             | ns                | 15     | 0   |
|            | + mandatorily fortified food | 3.15        | 1.12 | 2.73 | 6.65 | 7.74 | 15                          | ns                | 25     | 0   |
|            | + voluntarily fortified food | 3.77        | 1.46 | 3.37 | 7.34 | 8.73 | 15                          | ns                | 25     | 0   |
|            | + supplements                | 9.1         | 1.5  | 3.7  | 11.2 | 18.2 | 15                          | ns                | 25     | 2.0 |
| 11-14      | Food                         | 2.88        | 0.87 | 2.42 | 6.42 | 7.69 |                             | ns                | 15     | 0   |
|            | + mandatorily fortified food | 3.19        | 1.16 | 2.77 | 6.69 | 7.90 | 15                          | ns                | 50     | 0   |
|            | + voluntarily fortified food | 3.68        | 1.40 | 3.24 | 7.37 | 8.45 | 15                          | ns                | 50     | 0   |
|            | + supplements                | 5.4         | 1.4  | 3.5  | 8.9  | 11.3 | 15                          | ns                | 50     | 0.4 |
| 15-17      | Food                         | 2.90        | 0.87 | 2.44 | 6.46 | 7.74 |                             | ns                | 15     | 0   |
|            | + mandatorily fortified food | 3.24        | 1.13 | 2.78 | 6.96 | 8.21 | 15                          | ns                | 50     | 0   |
|            | + voluntarily fortified food | 3.62        | 1.34 | 3.22 | 7.36 | 8.46 | 15                          | ns                | 50     | 0   |
|            | + supplements                | 6.9         | 1.4  | 3.5  | 9.4  | 13.9 | 15                          | ns                | 50     | 1.0 |
| 18-39      | Food                         | 2.97        | 0.90 | 2.50 | 6.61 | 7.92 |                             | ns                | 15     | 0   |
|            | + mandatorily fortified food | 3.45        | 1.24 | 3.00 | 7.18 | 8.51 | 15                          | ns                | 50     | 0   |
|            | + voluntarily fortified      | 3.84        | 1.45 | 3.41 | 7.68 | 8.97 | 15                          | ns                | 50     | 0   |



|       |                                 |      |      |      |      |      |    |    |    |     |  |
|-------|---------------------------------|------|------|------|------|------|----|----|----|-----|--|
|       | food                            |      |      |      |      |      |    |    |    |     |  |
|       | + supplements                   | 11.6 | 1.6  | 3.9  | 17.8 | 37.7 | 15 | ns | 50 | 2.2 |  |
| 40-64 | Food                            | 3.09 | 0.94 | 2.60 | 6.87 | 8.22 |    | ns | 15 | 0   |  |
|       | + mandatorily<br>fortified food |      |      |      |      |      |    | ns |    |     |  |
|       | + voluntarily<br>fortified food | 3.82 | 1.42 | 3.34 | 7.84 | 9.24 | 15 |    | 50 | 0   |  |
|       | + supplements                   | 4.24 | 1.67 | 3.77 | 8.38 | 9.79 | 15 | ns | 50 | 0   |  |
|       | + supplements                   | 10.1 | 1.8  | 4.6  | 19.8 | 28.3 | 15 | ns | 50 | 1.4 |  |

<sup>(1)</sup> When not enough evidence is available to set an EAR, an AI is set. The AI is based on the average intake of an apparently healthy population.

<sup>(2)</sup> When the median intake of the population > the AI, the risk for inadequate intake is low. No statement (ns) can be formulated on the adequacy of vitamin D when the median intake < AI.

EAR: Estimated average requirement; UL: upper intake level; AI: adequate intake

Table S8. Usual intake of vitamin E (mg/day) from food, fortified food and supplements in Belgian men (3-64 years), excluding miss-reporters, Belgian study on the intake of vitamins A, D, E and K (VITADEK-study) 2015

| Gender/age | Usual intake     | Percentiles |      |       |       | AI <sup>(2)</sup> | % inadequate <sup>(2)</sup> | UL                | % > UL |   |
|------------|------------------|-------------|------|-------|-------|-------------------|-----------------------------|-------------------|--------|---|
|            |                  | 5           | 50   | 95    | 97,5  |                   |                             |                   |        |   |
| 3-6        | Food             | 7.20        | 3.68 | 6.76  | 12.23 | 13.67             | 6-9 <sup>(1)</sup>          | ns <sup>(3)</sup> | 60     | 0 |
|            | + fortified food | 8.34        | 4.35 | 7.88  | 13.85 | 15.40             | 6                           | ns                | 60     | 0 |
|            | + supplements    | 8.68        | 4.40 | 8.16  | 14.66 | 16.39             | 6                           | ic <sup>(4)</sup> | 60     | 0 |
| 7-10       | Food             | 10.16       | 5.51 | 9.62  | 16.66 | 18.51             | 9                           | ic                | 100    | 0 |
|            | + fortified food | 10.92       | 5.96 | 10.37 | 17.78 | 19.84             | 9                           | low               | 100    | 0 |
|            | + supplements    | 11.14       | 6.06 | 10.58 | 18.29 | 20.22             | 9                           | low               | 100    | 0 |
| 11-14      | Food             | 12.04       | 6.60 | 11.41 | 19.60 | 21.72             | 13                          | ns                | 120    | 0 |
|            | + fortified food | 12.74       | 7.04 | 12.12 | 20.54 | 22.90             | 13                          | ns                | 120    | 0 |
|            | + supplements    | 12.99       | 7.22 | 12.29 | 21.23 | 23.40             | 13                          | ns                | 120    | 0 |
| 15-17      | Food             | 13.16       | 7.25 | 12.48 | 21.36 | 23.64             | 13                          | ns                | 130    | 0 |
|            | + fortified food | 13.78       | 7.66 | 13.11 | 22.22 | 24.43             | 13                          | ic                | 130    | 0 |
|            | + supplements    | 14.12       | 7.79 | 13.26 | 23.27 | 25.84             | 13                          | low               | 130    | 0 |
| 18-39      | Food             | 14.49       | 7.99 | 13.75 | 23.50 | 26.04             | 13                          | ic                | 150    | 0 |
|            | + fortified food | 15.12       | 8.37 | 14.41 | 24.32 | 26.97             | 13                          | low               | 150    | 0 |
|            | + supplements    | 15.60       | 8.49 | 14.74 | 25.58 | 28.46             | 13                          | low               | 150    | 0 |
| 40-64      | Food             | 13.28       | 7.24 | 12.58 | 21.70 | 24.05             | 13                          | ic                | 150    | 0 |
|            | + fortified food | 14.65       | 7.98 | 13.91 | 23.81 | 26.31             | 13                          | ic                | 150    | 0 |
|            | + supplements    | 15.29       | 8.10 | 14.35 | 25.63 | 29.06             | 13                          | ic                | 150    | 0 |

<sup>(1)</sup> The AI for vitamin E is 6 mg/day in children aged 1-3 years and 9 mg/day in children aged 4-6 years old.

<sup>(2)</sup> When not enough evidence is available to set an EAR, an AI is set. The AI is based on the average intake of an apparently healthy population.

<sup>(3)</sup> When the median intake of the population lies above the AI, the risk for inadequate intake is low. Since the distribution of requirements is not known no statement can be formulated on the adequacy of vitamin E when the median intake is lower than the AI.

<sup>(4)</sup> ic: inconclusive within a certain age-group

EAR: Estimated average requirement; UL: upper intake level; AI: adequate intake.

Table S9. Usual intake of vitamin E (mg/day) from food, fortified food and supplements in Belgian women (3-64 years), excluding miss-reporters, Belgian study on the intake of vitamins A, D, E and K (VITADEK-study) 2015

| Gender/age | Usual intake     | Percentiles |      |       |       | AI <sup>(2)</sup> | % inadequate <sup>(2)</sup> | UL                | % > UL |      |
|------------|------------------|-------------|------|-------|-------|-------------------|-----------------------------|-------------------|--------|------|
|            |                  | 5           | 50   | 95    | 97,5  |                   |                             |                   |        |      |
| 3-6        | Food             | 6.90        | 3.56 | 6.49  | 11.65 | 12.99             | 6-9 <sup>(1)</sup>          | ns <sup>(3)</sup> | 60     | 0    |
|            | + fortified food | 7.71        | 4.06 | 7.29  | 12.80 | 14.17             | 6                           | ns                | 60     | 0    |
|            | + supplements    | 8.29        | 4.17 | 7.72  | 14.24 | 16.13             | 6                           | ic <sup>(4)</sup> | 60     | 0.00 |
| 7-10       | Food             | 9.55        | 5.32 | 9.06  | 15.45 | 17.11             | 9                           | ic                | 100    | 0    |
|            | + fortified food | 10.27       | 5.75 | 9.76  | 16.51 | 18.24             | 9                           | low               | 100    | 0    |
|            | + supplements    | 10.66       | 5.87 | 10.02 | 17.51 | 19.33             | 9                           | low               | 100    | 0.00 |
| 11-14      | Food             | 10.73       | 6.01 | 10.19 | 17.28 | 19.12             | 11                          | ns                | 120    | 0    |
|            | + fortified food | 11.36       | 6.37 | 10.80 | 18.18 | 19.94             | 11                          | ic                | 120    | 0    |
|            | + supplements    | 11.66       | 6.44 | 11.08 | 19.14 | 21.23             | 11                          | ic                | 120    | 0.00 |
| 15-17      | Food             | 11.23       | 6.30 | 10.67 | 18.07 | 19.99             | 11                          | ns                | 130    | 0    |
|            | + fortified food | 11.77       | 6.71 | 11.17 | 18.76 | 20.66             | 11                          | ic                | 130    | 0    |
|            | + supplements    | 11.96       | 6.74 | 11.41 | 19.31 | 21.28             | 11                          | low               | 130    | 0.00 |
| 18-39      | Food             | 11.27       | 6.32 | 10.71 | 18.14 | 20.07             | 11                          | ns                | 150    | 0    |
|            | + fortified food | 11.94       | 6.72 | 11.38 | 19.12 | 21.15             | 11                          | low               | 150    | 0    |
|            | + supplements    | 13.72       | 6.97 | 12.04 | 22.75 | 27.17             | 11                          | low               | 150    | 0.21 |
| 40-64      | Food             | 10.15       | 5.66 | 9.64  | 16.39 | 18.16             | 11                          | ns                | 150    | 0    |
|            | + fortified food | 11.03       | 6.12 | 10.49 | 17.79 | 19.65             | 11                          | ic                | 150    | 0    |
|            | + supplements    | 12.90       | 6.40 | 11.62 | 24.14 | 28.05             | 11                          | ic                | 150    | 0.00 |

<sup>(1)</sup> The AI for vitamin E is 6 mg/day in children aged 1-3 years and 9 mg/day in children aged 4-6 years old.

<sup>(2)</sup> When not enough evidence is available to set an EAR, an AI is set. The AI is based on the average intake of an apparently healthy population.

<sup>(3)</sup> When the median intake of the population lies above the AI, the risk for inadequate intake is low. Since the distribution of requirements is not known no statement can be formulated on the adequacy of vitamin E when the median intake is lower than the AI.

<sup>(4)</sup> ic: inconclusive within a certain age-group

EAR: Estimated average requirement; UL: upper intake level; AI: adequate intake.

Table S10. Usual intake of vitamin K ( $\mu\text{g}/\text{day}$ ) from foods only in Belgian men (3-64 years), excluding miss-reporters, Belgian study on the intake of vitamins A, D, E and K (VITADEK-study) 2015

| Gender/age | Usual intake | Percentiles |        |        |        | AI <sup>(2)</sup>    | % inadequate <sup>(3)</sup> | UL                     | % > UL |
|------------|--------------|-------------|--------|--------|--------|----------------------|-----------------------------|------------------------|--------|
|            |              | 5           | 50     | 95     | 97,5   |                      |                             |                        |        |
| 3-6        | 59.1         | 20.98       | 51.05  | 124.11 | 147.14 | 12-20 <sup>(1)</sup> | low <sup>(3)</sup>          | 200-300 <sup>(1)</sup> | 0.17   |
| 7-10       | 63.2         | 22.46       | 54.59  | 132.83 | 157.35 | 30                   | low                         | 450                    | 0.01   |
| 11-14      | 67.5         | 24.00       | 58.36  | 141.94 | 168.28 | 45                   | low                         | 750                    | 0.00   |
| 15-17      | 71.6         | 25.44       | 61.89  | 150.51 | 178.44 | 65                   | ns                          | 900                    | 0.00   |
| 18-39      | 89.7         | 31.17       | 77.11  | 190.73 | 226.76 | 70                   | ic <sup>(4)</sup>           | 1000                   | 0.00   |
| 40-64      | 129.2        | 44.71       | 110.88 | 275.28 | 327.81 | 70                   | low                         | 1000                   | 0.00   |

<sup>(1)</sup> The AI for vitamin K is 12  $\mu\text{g}/\text{day}$  in children aged 1-3 years and 20  $\mu\text{g}/\text{day}$  in children aged 4-6 years old. The UL for vitamin K is 200  $\mu\text{g}/\text{day}$  in children aged 1-3 years and 300  $\mu\text{g}/\text{day}$  in children aged 4-6 years old.

<sup>(2)</sup> When not enough evidence is available to set an EAR, an AI is set. The AI is based on the average intake of an apparently healthy population.

<sup>(3)</sup> When the median intake of the population lies above the AI, the risk for inadequate intake is low. Since the distribution of requirements is not known no statement (ns) can be formulated on the adequacy of vitamin K when the median intake is lower than the AI.

<sup>(4)</sup> ic: inconclusive within a certain age-group.

EAR: Estimated average requirement; UL: upper intake level; AI: adequate intake.

Table S11. Usual intake of vitamin K ( $\mu\text{g}/\text{day}$ ) from foods only in Belgian women (3-64 years), excluding miss-reporters, Belgian study on the intake of vitamins A, D, E and K (VITADEK-study) 2015

| Gender/age | Usual intake | Percentiles |       |       |       | AI <sup>(2)</sup>    | % Inadequate <sup>(3)</sup> | UL                     | % > UL |
|------------|--------------|-------------|-------|-------|-------|----------------------|-----------------------------|------------------------|--------|
|            |              | 5           | 50    | 95    | 97,5  |                      |                             |                        |        |
| 3-6        | 56.0         | 18.2        | 47.3  | 123.0 | 147.9 | 12-20 <sup>(1)</sup> | low <sup>(3)</sup>          | 200-300 <sup>(1)</sup> | 0.2    |
| 7-10       | 64.8         | 21.1        | 54.8  | 142.1 | 170.8 | 30                   | low                         | 450                    | 0.0    |
| 11-14      | 72.5         | 23.6        | 61.3  | 158.9 | 190.6 | 45                   | low                         | 750                    | 0.0    |
| 15-17      | 78.8         | 25.7        | 66.7  | 172.7 | 207.3 | 65                   | low                         | 900                    | 0.0    |
| 18-39      | 101.4        | 32.4        | 85.3  | 224.6 | 270.3 | 70                   | ic <sup>(4)</sup>           | 1000                   | 0.0    |
| 40-64      | 139.1        | 44.8        | 117.2 | 306.8 | 369.1 | 70                   | low                         | 1000                   | 0.0    |

<sup>(1)</sup> The AI for vitamin K is 12  $\mu\text{g}/\text{day}$  in children aged 1-3 years and 20  $\mu\text{g}/\text{day}$  in children aged 4-6 years old. The UL for vitamin K is 200  $\mu\text{g}/\text{day}$  in children aged 1-3 years and 300  $\mu\text{g}/\text{day}$  in children aged 4-6 years old.

<sup>(2)</sup> When not enough evidence is available to set an EAR, an AI is set. The AI is based on the average intake of an apparently healthy population.

<sup>(3)</sup> When the median intake of the population lies above the AI, the risk for inadequate intake is low. Since the distribution of requirements is not known no statement (ns) can be formulated on the adequacy of vitamin E when the median intake is lower than the AI.

<sup>(4)</sup> ic: inconclusive within a certain age-group

EAR: Estimated average requirement; UL: upper intake level; AI: adequate intake
